# Supplementary material for: Tuning the stability of liquids by controlling the formation of interfacial surfactants
Source: Royal Society of Chemistry journal article supplement (doi:10.1039/d2nj03101a), 2022-01-01
Supplement: d2nj03101a1.pdf [file d2nj03101a1.pdf]

# SUPPORTING INFORMATION FOR

## Tuning the stability of liquids by controlling the formation of interfacial surfactants

Xiaoying Yang<sup>a</sup>, Zhaocan Zhong<sup>a</sup>, Shiyuan Zhou<sup>a</sup>, Peiyang Gu<sup>a</sup>, Qingfeng Xu<sup>a\*</sup>,

Jianmei Lu<sup>a\*</sup>

<sup>a</sup>College of Chemistry, Chemical Engineering and Materials Science of Soochow  
University

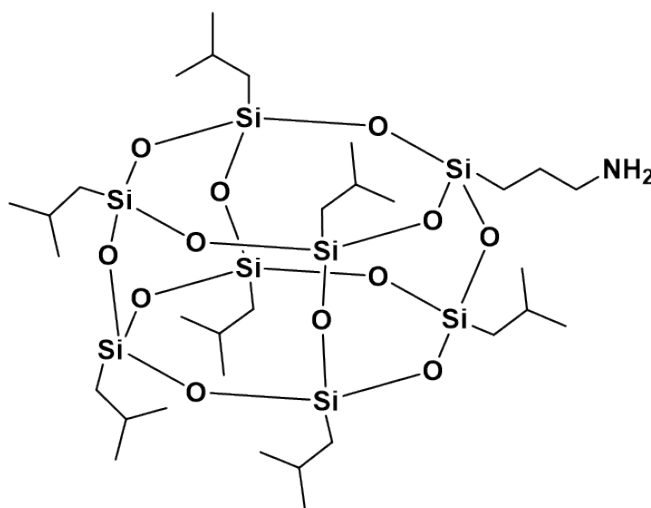

**Figure S1.** The chemical structure of POSS-NH<sub>2</sub>.

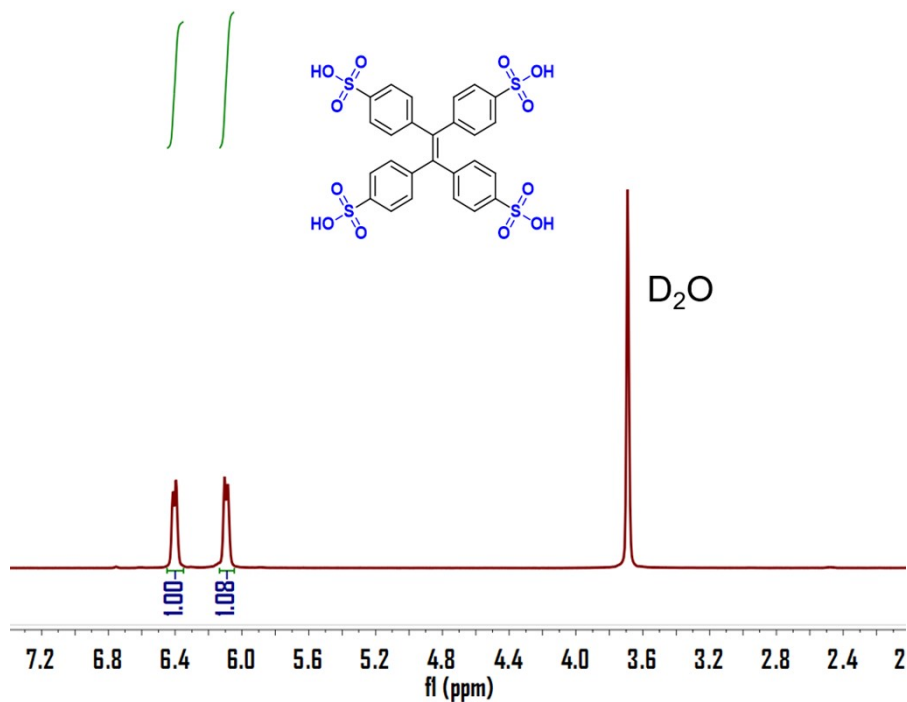

Figure S2.  $^1\text{H}$  NMR (300 MHz) of TPE- $\text{SO}_3\text{H}$  in  $\text{D}_2\text{O}$ .

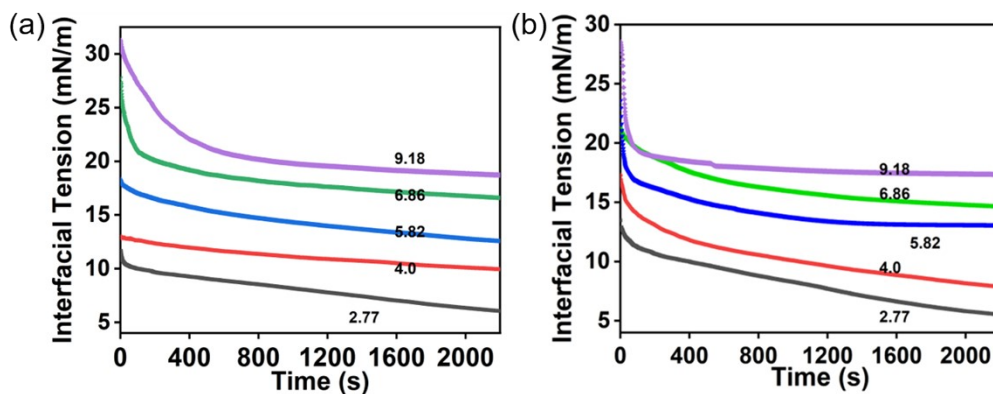

Figure S3. (a) Time evolution of the interfacial tension of Su-TPE (0.01 M) in water with different pH to POSS- $\text{NH}_2$  in toluene; (b) Time evolution of the interfacial tension of Su-Py (0.01 M) in water with different pH to POSS- $\text{NH}_2$  in toluene.  $C_{\text{POSS-NH}_2} = 1.0 \text{ g/L}$ .

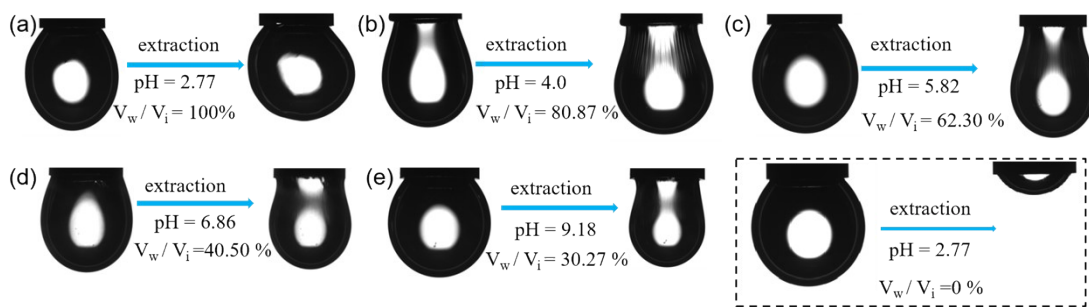

Figure S4. a-e) Changes in droplets shape of Su-Py (0.01 M) in water with different pH to POSS- $\text{NH}_2$  in toluene for 2600 s; f) Changes in droplets shape of Su-TPE (0.01 M, pH=2.77) in water to POSS- $\text{NH}_2$  in toluene for 2600 s. Scale bar: 2.0 mm.

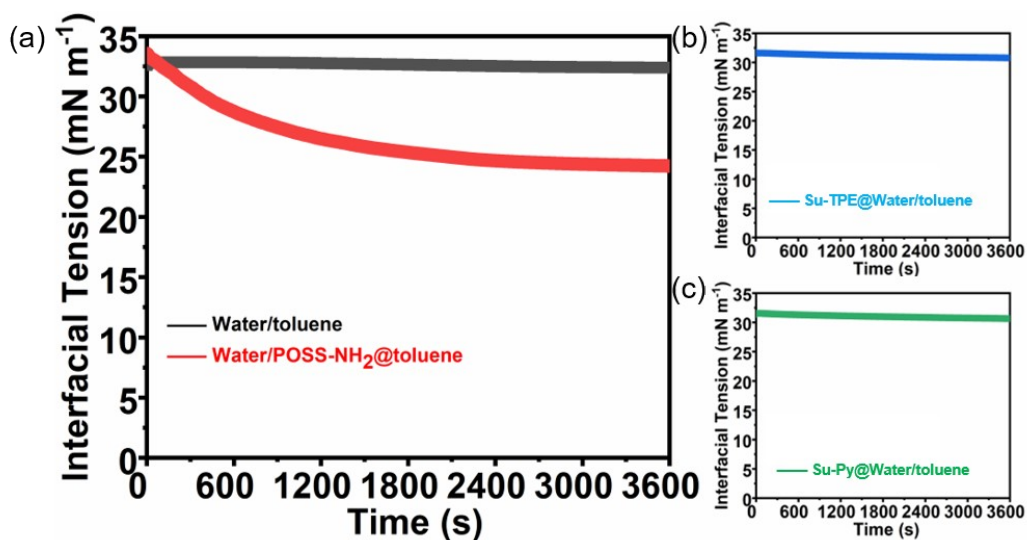

**Figure S5.** The time evolution of the interfacial tension of different oil-water systems. a) water/toluene and water/POSS-NH<sub>2</sub>@toluene, b) Su-TPE@water/toluene, c) Su-Py@water/toluene ([Su-TPE] = 0.01 M, [Su-Py] = 0.01 M, [POSS-NH<sub>2</sub>] = 0.1 g L<sup>-1</sup>).

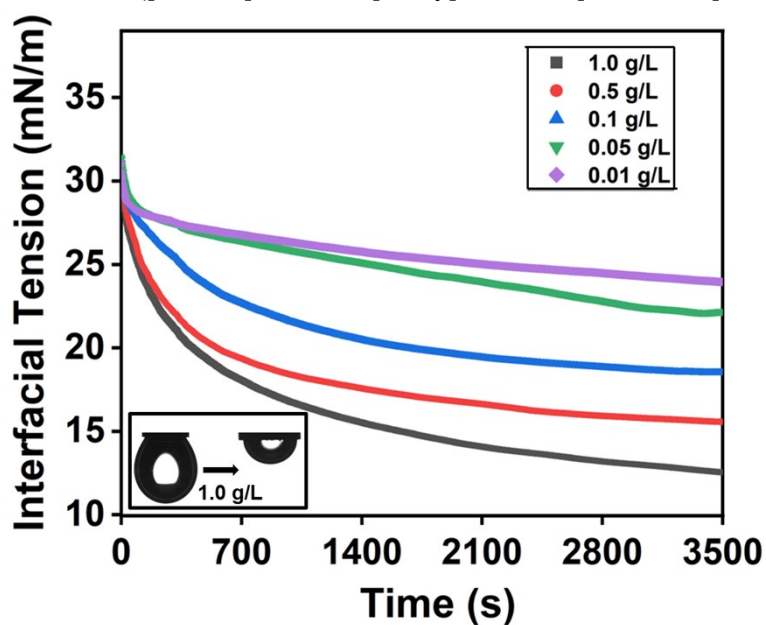

**Figure S6.** The time evolution of the interfacial tension of different concentrations of POSS-NH<sub>2</sub> in toluene to pure water (The inset shows the change in droplet shape after the assembly of pure water in 1.0 g/L POSS-NH<sub>2</sub> solution in toluene for 2600s).

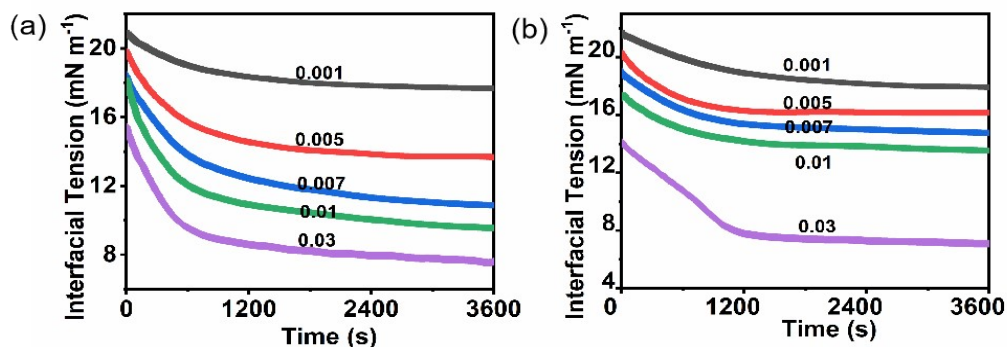

**Figure S7.** a) Time evolution of the toluene interfacial tension of different concentrations of Su-Py (pH = 4.0) to 0.1 g L<sup>-1</sup> POSS-NH<sub>2</sub> in water. b) Time evolution of the toluene interfacial tension of different concentrations of Su-TPE (pH = 4.0) to 0.1 g L<sup>-1</sup> POSS-NH<sub>2</sub> in water.

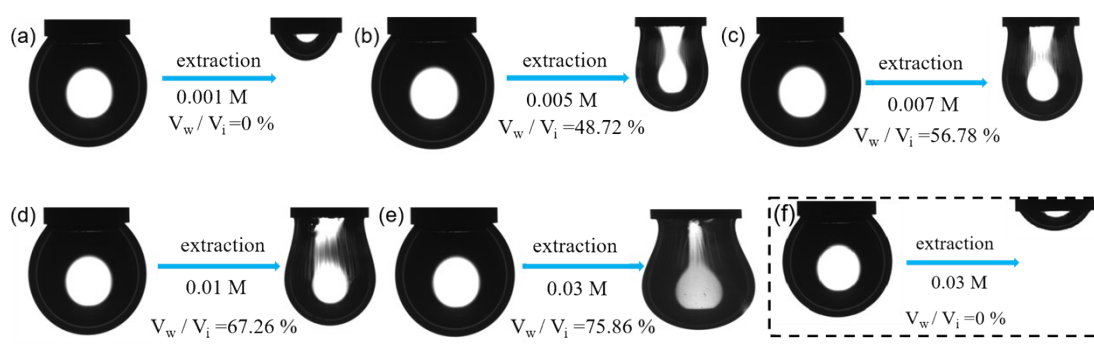

**Figure S8.** a-e) Changes in droplets shape of different concentrations of Su-Py assembled in the toluene phase of 0.1 g L<sup>-1</sup> POSS-NH<sub>2</sub> for 2600 s. f) Changes in droplets shape of Su-TPE (0.03 M) assembled in the toluene phase of 0.1 g L<sup>-1</sup> POSS-NH<sub>2</sub> for 2600 s. Scale bar: 2.0 mm.

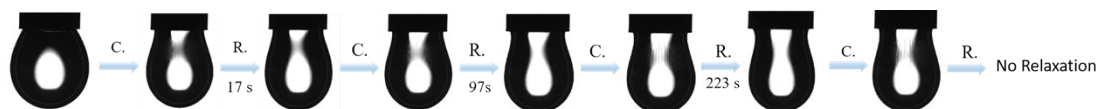

**Figure S9.** Snapshots of droplet's morphology evolution in an extraction- reinjection process, [Su-Py] = 0.01 M, [POSS-NH<sub>2</sub>] = 1.0 g/L, pH=4.0. Scale bar: 2.0 mm.

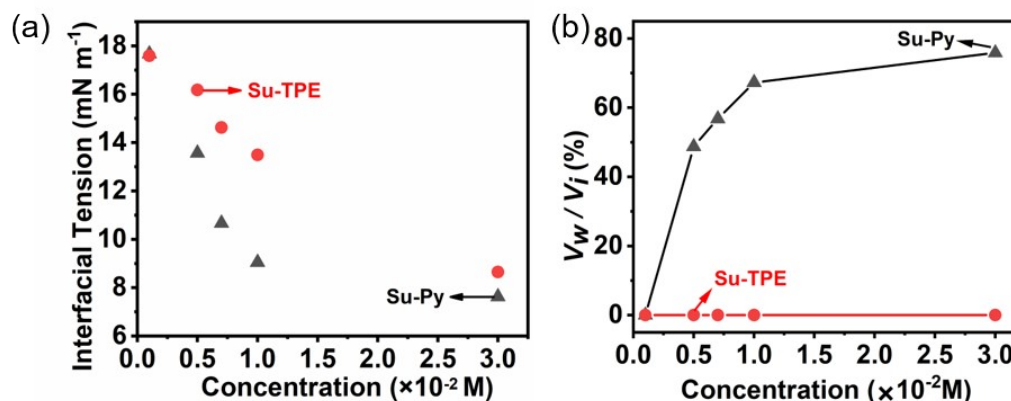

**Figure S10.** a) Equilibrium interfacial tension in water solution with different concentrations of Su-Py or Su-TPE ([POSS-NH<sub>2</sub>] = 1.0 g L<sup>-1</sup>). b) Coverage rate of different concentrations of Su-Py or Su-TPE in water solution ([POSS-NH<sub>2</sub>] = 1.0 g L<sup>-1</sup>).

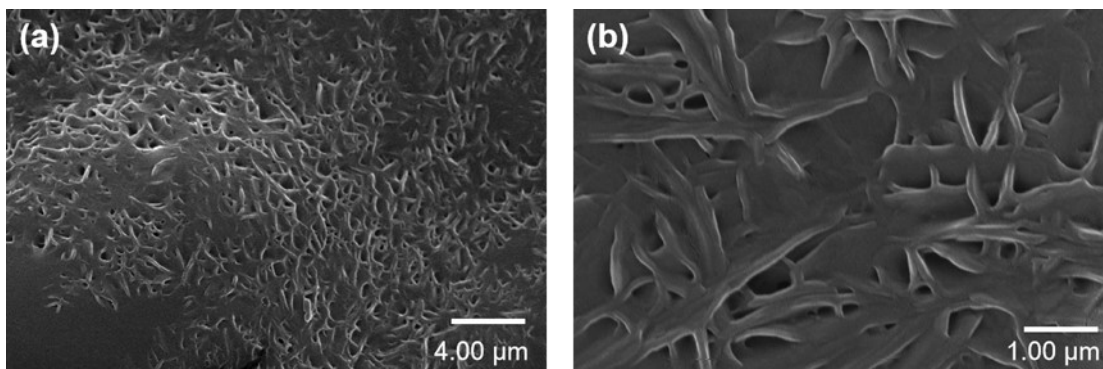

**Figure S11.** The SEM image of the film assembled by Su-Py (0.01 M, pH=4.0) and POSS-NH<sub>2</sub> (1.0 g/L). a) 4.00 μm; b) 1.00 μm.

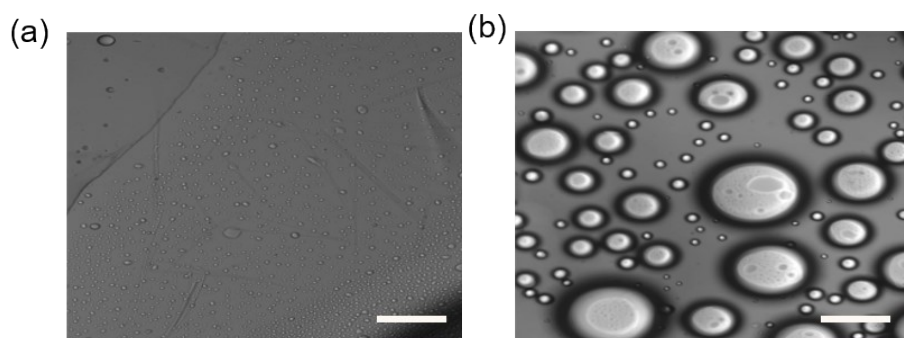

**Figure S12.** a) Confocal fluorescence of 0.01 M Su-Py in 1.0 g L<sup>-1</sup> POSS-NH<sub>2</sub> mesitylene ( $V_{\text{Su-Py}}: V_{\text{POSS-NH}_2}=1:1$ ) in the bright field. b) Confocal fluorescence of 0.01 M Su-TPE in 1.0 g L<sup>-1</sup> POSS-NH<sub>2</sub> mesitylene ( $V_{\text{Su-TPE}}: V_{\text{POSS-NH}_2}=1:1$ ) in the bright field. Scale bar: 75 μm.

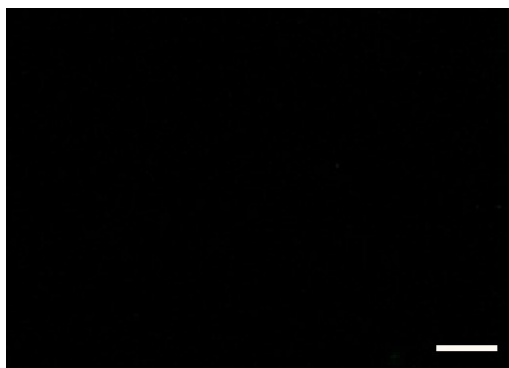

**Figure S13.** Confocal fluorescence of 0.01 M Su-TPE in 1.0 g L<sup>-1</sup> POSS-NH<sub>2</sub> mesitylene ( $V_{\text{Su-TPE}}: V_{\text{POSS-NH}_2}=1:1$ ) in the dark field. Scale bar: 75 μm.

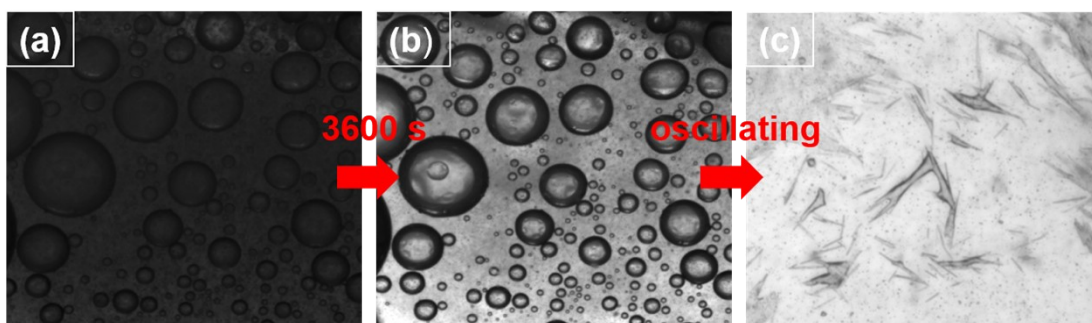

**Figure S14.** Optical microscopy images of Su-Py and POSS-NH<sub>2</sub> interface assembly. (a) At the beginning of the assembly; (b) The assembly after 3600 s; (c) Oscillation the interface. Scale bar: 0.5 mm.

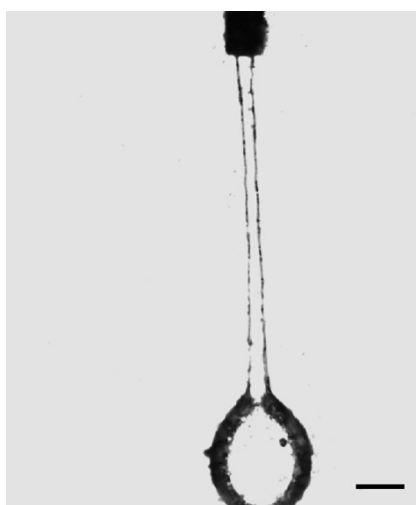

**Figure S15.** Manual 3D printing of Su-Py (0.01M, pH = 4.0) in 10 mg/mL POSS-NH<sub>2</sub> in silicone oil (10000 cst) solution. Needle Diameter: 0.5 mm, flow rate: 3  $\mu$ L/s. Scale bar: 0.5 mm.

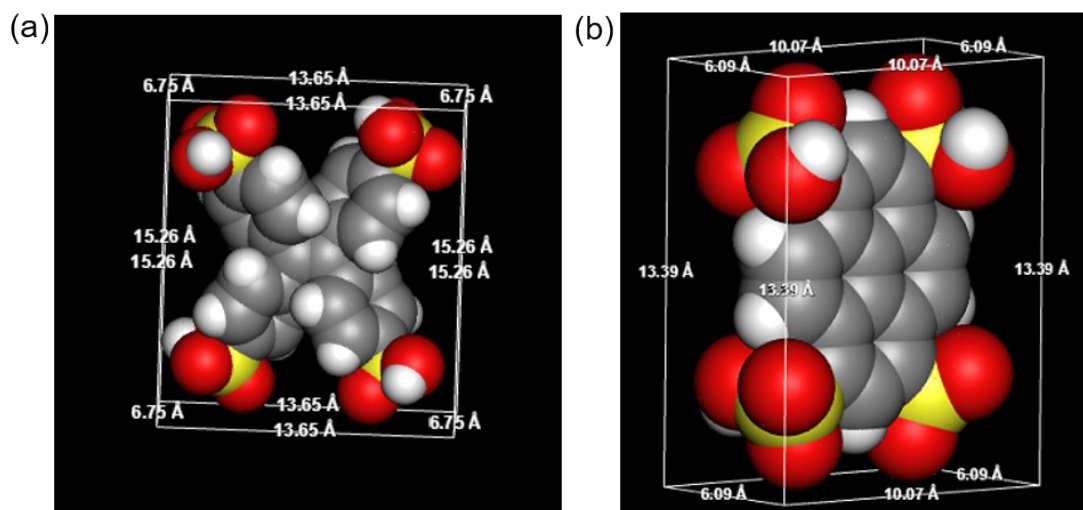

**Figure S16.** Molecular simulation structure of the Su-TPE (a) / Su-Py (b) showing the dimensions of the molecules.

Note: Draw the structural formula of the molecule in Chemdraw, and then determine the three-dimensional coordinates of each atom in the entire molecule. Then calculate the radius of the molecule according to the calculation method of radius summed up by Hu et al<sup>1</sup> in 2010.

The method of calculation refers to reference<sup>2-3</sup>

---

(1) Hu, S, Z.; Xie Z X.; Zhou, Z, H. 70 Years of Crystallographic van der Waals Radii. *Acta Phys. Chim. Sin.*, **2010**, 26(07): 1795-1800.

(2) Eigenvalue algorithm

(3) Numerical diagonalization of 3x3 matrices
